# Supplementary material for: Development of iRGD-Modified Peptide Carriers for Suicide Gene Therapy of Uterine Leiomyoma
Source: PubMed Central journal article supplement (PMC7913275; doi:10.3390/pharmaceutics13020202), 2021-02-02
Supplement: pharmaceutics-13-00202-s001.pdf [file pharmaceutics-13-00202-s001.pdf]

# Supplementary Materials: Development of iRGD-Modified Peptide Carriers for Suicide Gene Therapy of Uterine Leiomyoma

Anna Egorova, Sofia Shtykalova, Alexander Selutin, Natalia Shved, Marianna Maretina, Sergei Selkov, Vladislav Baranov and Anton Kiselev

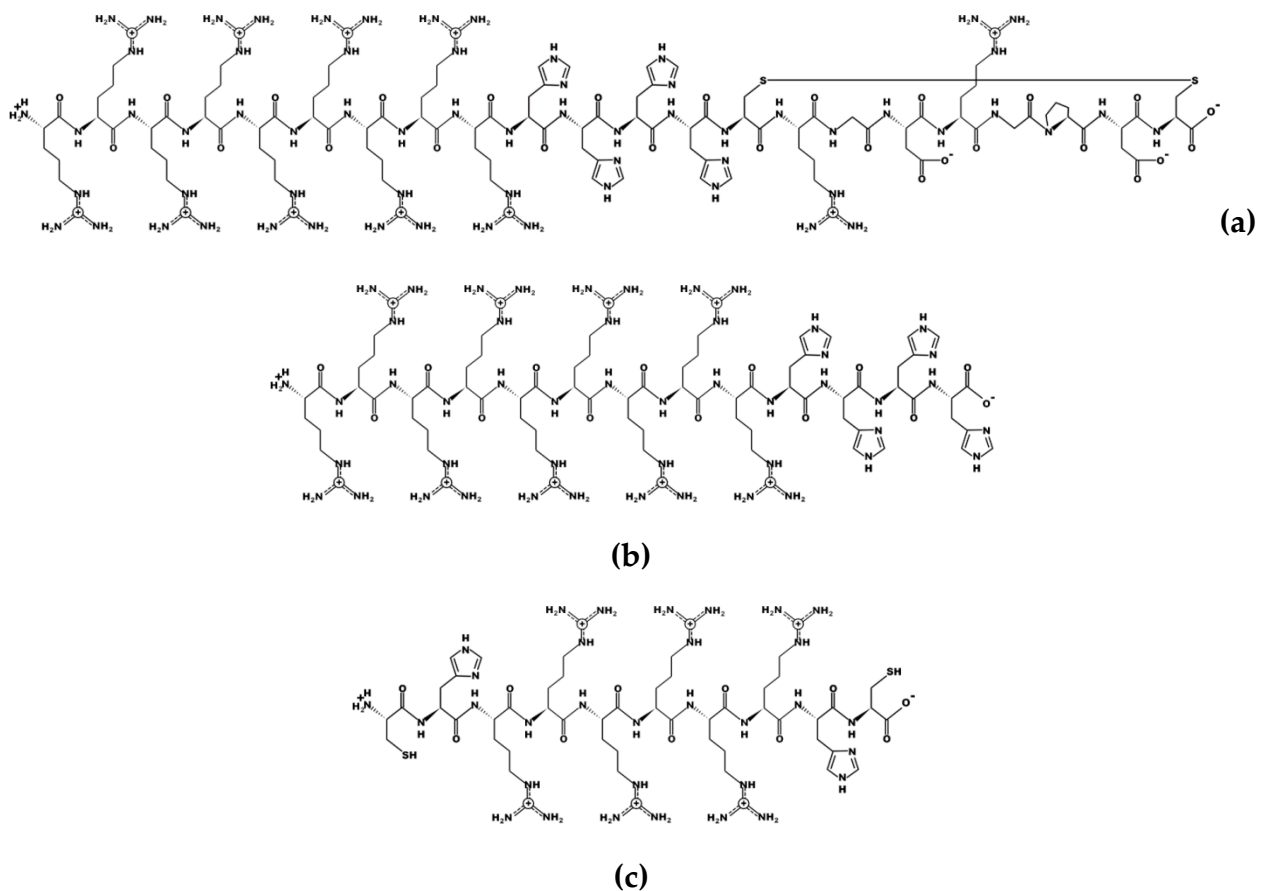

**Figure S1.** Molecular structures of RGD1 (a), RGD0 (b), and R6 (c) peptides. The images were processed by PepDraw software (<http://pepdraw.com/>).

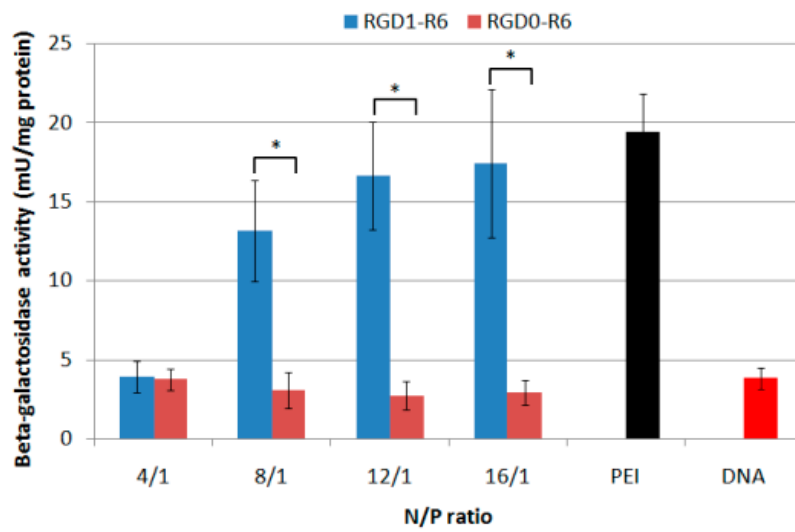

**Figure S2.** Transfection efficacy evaluation of RGD1-R6 and RGD0-R6-polyplexes formed with pCMV-lacZ plasmid in PANC-1 cells in presence of fetal bovine serum. \*  $p < 0.05$  compared to RGD0-polyplexes.

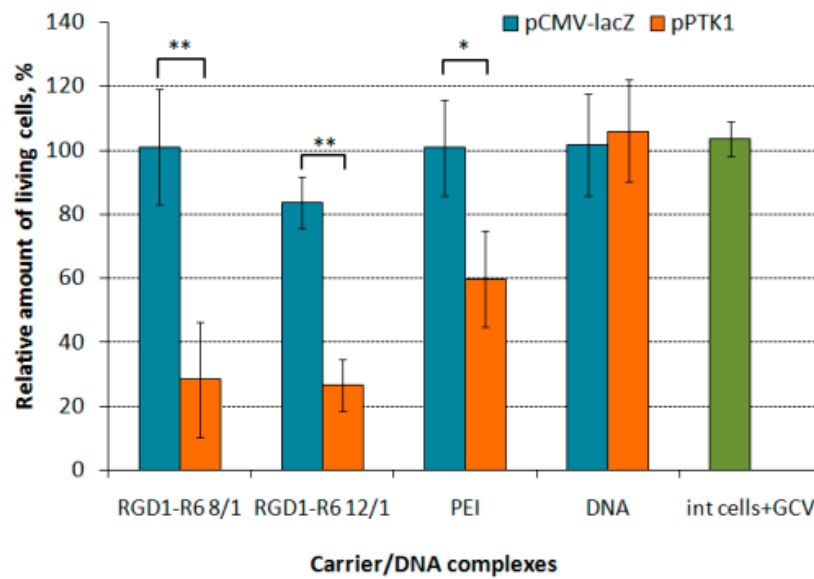

**Figure S3.** PANC-1 cell viability after HSV thymidine kinase expression and GCV treatment. Values are the mean  $\pm$  SD of the mean of triplicates. \*  $p < 0.05$ , \*\*  $p < 0.01$  compared to pCMV-lacZ-complexes.

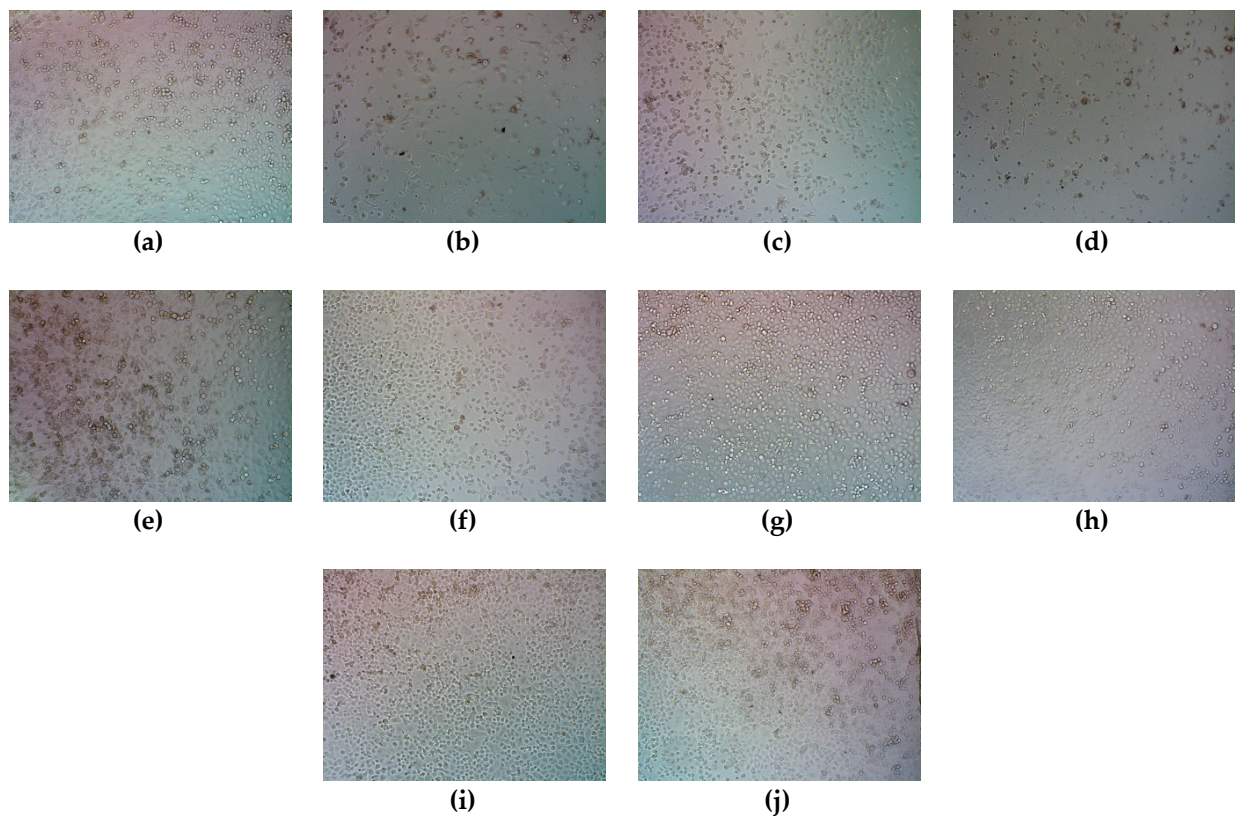

**Figure S4.** Typical microphotographs in bright field after 96 h of GCV treatment. The PANC-1 cells were transfected with RGD1-R6/pCMV-lacZ polyplexes at N/P ratios of (a) 8/1, (c) 12/1; with RGD1-R6/pPTK1 complexes at (b) 8/1, (d) 12/1 charge ratio; with PEI/DNA complexes using (e) pCMV-lacZ and (f) pPTK1 plasmids; with (g) pCMV-lacZ and (h) pPTK1 plasmids only. Control wells contained (i) GCV treated intact cells and (j) untreated intact ones.

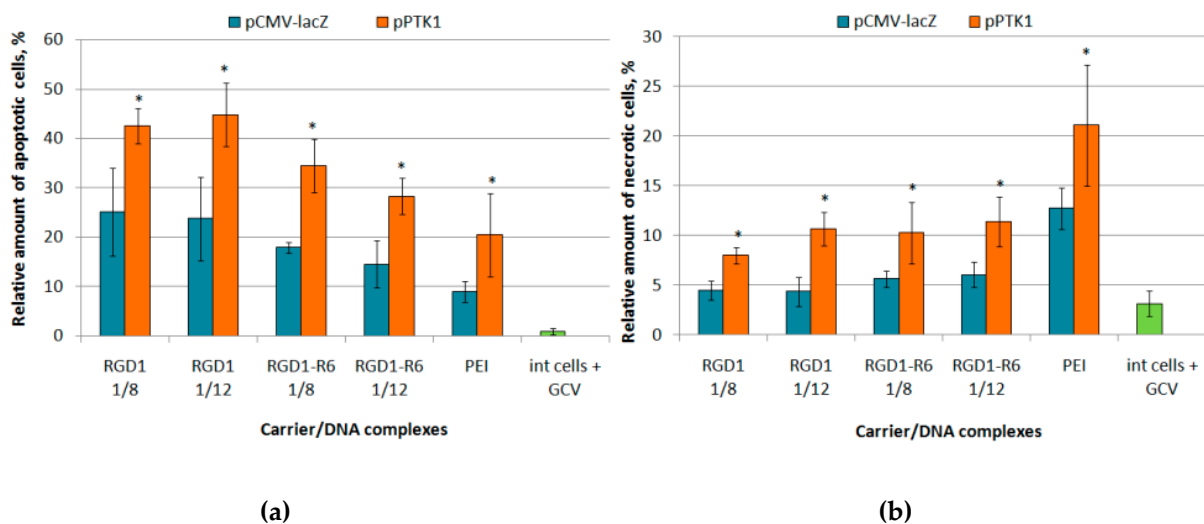

**Figure S5.** Apoptosis (a) and necrosis (b) of PANC-1 cells induced by GCV treatment after cell transfection with RGD1-R6/DNA or RGD1/DNA polyplexes formed with pPTK and pCMV-lacZ plasmids. Values are the mean  $\pm$  SEM of the mean of four independent experiments. \*  $p < 0.05$  compared to pCMV-lacZ-complexes.
